# Supplementary material
Source: PubMed Central journal article supplement (PMC3977132)
Supplement: NIHMS563042-supplement-01.pdf [file NIHMS563042-supplement-01.pdf]

Supplementary material:

Table S1. List of primer used in this study.

| No. | sequence                                                                   | description                                                                          |
|-----|----------------------------------------------------------------------------|--------------------------------------------------------------------------------------|
| 605 | 5'-GGATCCGGGACATTTAGTCCATTAC-3'                                            | Forward primer for upstream region <i>ΔaapF</i> with <i>PstI</i> restriction site    |
| 606 | 5'-<br>AATTTATATACTTTTACTGTGTGAATATACACAAGTAGATAA<br>AGTTAAATATTTTTTATA-3' | Reverse primer for upstream region <i>ΔaapF</i> , overlapping region                 |
| 607 | 5'-<br>TATAAAAAATATTTAACTTTATCTAGTTGTGTATATTCACAC<br>AGTAAAAGTATATAAATT-3' | Forward primer for downstream region <i>ΔaapF</i> , overlapping region               |
| 642 | 5'-GCGGGATCCTCTACCGGCAGGGATAGAAG-3'                                        | Reverse primer for downstream region <i>ΔaapF</i> with <i>BamHI</i> restriction site |
| 583 | 5'-CTGCTATTCTATCTCCTGCAGG-3'                                               | Forward sequencing primer <i>ΔaapF</i>                                               |
| 584 | 5'-CAGTGTGCTGGAGCTC-3'                                                     | reverse sequencing primer <i>ΔaapF</i>                                               |
| 668 | 5'-<br>CATCTGCAGGCGCCATGCTCTTCTTCAGG-3'                                    | Forward primer for upstream region <i>ΔaapA</i> with <i>PstI</i> restriction site    |
| 669 | 5'-GATATATTAGCGTATAACGTGATATCATGGTAATC-3'                                  | Reverse primer for upstream region <i>ΔaapA</i> overlapping region                   |
| 670 | 5'-GATATCACGTTATACGCTAATATATCAAGGGTAAAAAC-<br>3'                           | Forward primer for downstream region <i>ΔaapA</i> overlapping region                 |
| 671 | 5'-CATGGATCCGTTTCTTCGGATATGATGTC-3'                                        | Reverse primer for downstream region <i>ΔaapA</i> with <i>BamHI</i> restriction site |
| 672 | 5'-GCTCCAGGTATAAAGGTCTC-3'                                                 | Forward sequencing primer <i>ΔaapA</i>                                               |
| 673 | 5'-GGTCAAGATTGTTGACAATG-3'                                                 | reverse sequencing primer <i>ΔaapA</i>                                               |
| 674 | 5'-CATCTGCAGCTCTCGCTTAAGTACTGAAC-3'                                        | Forward primer for upstream region <i>ΔaapB</i> with <i>PstI</i> restriction site    |
| 675 | 5'-CTTATCCTTGCTTGCTCTTCTTACCTCTATATTC-3'                                   | Reverse primer for upstream region <i>ΔaapB</i> , overlapping region                 |
| 676 | 5'-GAAGAGCAAGCAAGGATAAGATAATAACAATATCC-3'                                  | Forward primer for downstream region <i>ΔaapB</i> , overlapping region               |

|      |                                            |                                                                                          |
|------|--------------------------------------------|------------------------------------------------------------------------------------------|
| 677  | 5'-CATGGATCCCACTCAAAGCTCCGTAAGAC<br>-3'    | Reverse primer for downstream region<br><i>ΔaapB</i> with <i>Bam</i> HI restriction site |
| 678  | 5'-GCGACTCCCTGAAGTCTATC-3'                 | Forward sequencing primer <i>ΔaapB</i>                                                   |
| 679  | 5'-ACCTGGTTTAGCTCCTTGTC-3'                 | reverse sequencing primer <i>ΔaapB</i>                                                   |
| 680  | 5'-CATTGGGCCCGTTTGC GTTTGGTCTGATCC-3'      | Forward primer for upstream region<br><i>ΔaapX</i> with <i>Ap</i> al restriction site    |
| 681  | 5'-GAGGATTATGGGATGAAAGAAAGTTTTAC-3'        | Reverse primer for upstream region<br><i>ΔaapX</i> , overlapping region                  |
| 682  | 5'-CTTTCATCCCATAATCCTCCCTTAAATTTAG-3'      | Forward primer for downstream region<br><i>ΔaapX</i> , overlapping region                |
| 683  | 5'-CATTCTGCAGTATTTGGTGCTCTCGGAAAG-3'       | Reverse primer for downstream region<br><i>ΔaapX</i> with <i>Pst</i> I restriction site  |
| 684  | 5'-GACTATTTTCTCTCTTGATAAAATG-3'            | Forward sequencing primer <i>ΔaapX</i>                                                   |
| 685  | 5'-ATAAAGCAAGGCGTGATCTC-3'                 | reverse sequencing primer <i>ΔaapX</i>                                                   |
| 686  | 5'-CATATCCATGGGCGTGCACTCAAATC-3'           | Forward primer for upstream region<br><i>ΔaapE</i> with <i>Nco</i> I restriction site    |
| 687  | 5'-GTAAATTTACTCGTGTGCTAAAGTATAACCTAATC-3'  | Reverse primer for upstream region<br><i>ΔaapE</i> , overlapping region                  |
| 688  | 5'-CTTTAGCAACACGAGTAAATTTACTAAGTGCCATAG-3' | Forward primer for downstream region<br><i>ΔaapE</i> , overlapping region                |
| 689  | 5'-CATTGGATCCGAGTGGATTTGAGGAATATG-3'       | Reverse primer for downstream region<br><i>ΔaapE</i> with <i>Bam</i> HI restriction site |
| 690  | 5'-TTGTGGGTTATTTGGTAATC-3'                 | Forward sequencing primer <i>ΔaapE</i>                                                   |
| 691  | 5'-CTCAGTCTAGCGCATATAAG-3'                 | reverse sequencing primer <i>ΔaapE</i>                                                   |
| 696  | 5'-CTCTAATTTAACGTCTCAGTAACTAGC-3'          | <i>aapA</i> -qRT-PCR-fw                                                                  |
| 697  | 5'-CCTACTTGTTCCATAGGATTGTTAGG-3'           | <i>aapA</i> -qRT-PCR-rev                                                                 |
| 3504 | 5'-CTTCTATCCCTGCCGGTAGAAC-3'               | <i>aapB</i> -qRT-PCR-fw                                                                  |
| 3505 | 5'-CTGTGTATGATGCACCTGGAGAG-3'              | <i>aapB</i> -qRT-PCR-rev                                                                 |
| 3512 | 5'-CTCCTGACTACCAACTGACTATTTATC-3'          | <i>aapF</i> -qRT-PCR-fw                                                                  |
| 3513 | 5'-GTTCAACCAGTAGAATAGCTCTTTACAC-3'         | <i>aapF</i> -qRT-PCR-rev                                                                 |
| 3510 | 5'-GACATATATGGGGACATTTAGTCCATTC-3'         | <i>aapE</i> -qRT-PCR-fw                                                                  |
| 3511 | 5'-GACATATATGGGGACATTTAGTCCATTC-3'         | <i>aapE</i> -qRT-PCR-rev                                                                 |

|      |                                             |                                       |
|------|---------------------------------------------|---------------------------------------|
| 698  | 5'-GAAAGGTAATCCTTCAACTCGGATAAC-3'           | <i>aapX</i> -qRT-PCR-fw               |
| 699  | 5'-GAAGAGAGTATGCGAAACTATACATAAC-3'          | <i>aapX</i> -qRT-PCR-rev              |
| 1480 | 5'-CCT GCA ACA TCT ATC CAT AAC ATA CCG A-3' | <i>secY</i> -housekeeping-qRT-PCR-fw  |
| 1481 | 5'-CCT CAT AGT GTA TAT GCT TTA GTA GTA G-3' | <i>secY</i> -housekeeping-qRT-PCR-rev |

---
